# Supplementary material for: Synthesis and characterization of metal complexes with a mixed 4-imidazole-containing ligand and a variety of multi-carboxylic acids
Source: Royal Society of Chemistry journal article supplement (doi:10.1039/c000373e), 2010-01-01
Supplement: c000373e.pdf [file c000373e.pdf]

## *Electronic supplementary information (ESI)*

### **Synthesis and characterization of metal complexes constructed from mixed 4-imidazole-containing ligand and varied multi-carboxylate†**

**Shui-Sheng Chen,<sup>a,b</sup> Zheng-Shuai Bai,<sup>a</sup> Jian Fan,<sup>a</sup> Gao-Chao Lv,<sup>a</sup> Zhi Su,<sup>a</sup> Man-Sheng Chen<sup>a</sup> and Wei-Yin Sun<sup>\*a</sup>**

<sup>a</sup> *Coordination Chemistry Institute, State Key Laboratory of Coordination Chemistry, School of Chemistry and Chemical Engineering, Nanjing National Laboratory of Microstructures, Nanjing University, Nanjing 210093, China E-mail: [sunwy@nju.edu.cn](mailto:sunwy@nju.edu.cn); Fax: +86 25 83314502*

<sup>b</sup> *School of Chemistry and Chemical Engineering, Fuyang Teachers College, Fuyang 236041, China*

Table S1 Hydrogen bonding data for complexes **1 - 6**

| D-H...A           | d(D...A) (Å) | ∠D-H...A (°) |
|-------------------|--------------|--------------|
| Compound <b>1</b> |              |              |
| O1W-H1W...O2#1    | 2.836(2)     | 172(3)       |
| N2-H2A...O4#2     | 2.847(2)     | 169          |
| O1W-H2W...O4      | 2.662(2)     | 160(3)       |
| N4-H4A...O3#3     | 2.821(2)     | 148          |
| C4-H4...O4#2      | 3.322(3)     | 152          |
| C8-H8...O2#2      | 3.053(2)     | 130          |
| C12-H12...O1W#4   | 2.966(3)     | 111          |
| Compound <b>2</b> |              |              |
| N1-H1...O1#5      | 2.848(3)     | 162          |

|                |          |     |
|----------------|----------|-----|
| N3-H3...O4#6   | 2.676(3) | 169 |
| C2-H2...O5#7   | 3.02(2)  | 115 |
| C12-H12...O5#8 | 3.35(3)  | 171 |

**Compound 3**

|                 |          |     |
|-----------------|----------|-----|
| N2-H2A...O3#9   | 2.757(4) | 147 |
| N3-H3A...O1#10  | 2.738(4) | 150 |
| C8-H8...O2#11   | 3.324(4) | 174 |
| C11-H11...O4#12 | 3.298(4) | 167 |

**Compound 4**

|               |          |     |
|---------------|----------|-----|
| N2-H2...O1#13 | 2.818(4) | 164 |
| N4-H4...O4#14 | 2.799(5) | 132 |
| C5-H5...O5#15 | 3.347(5) | 144 |

**Compound 5**

|                 |          |        |
|-----------------|----------|--------|
| N1-H1A...O1W#16 | 2.931(4) | 173    |
| O1W-H1W...O2#17 | 2.921(4) | 174(4) |
| O1W-H2W...O3#18 | 3.120(4) | 144(4) |
| N3-H3A...O2#19  | 2.751(3) | 170    |
| C9-H9...O4#16   | 3.365(4) | 156    |
| C11-H11...O4#16 | 3.481(4) | 164    |
| C12-H12...O2#20 | 3.158(4) | 140    |

**Compound 6**

|                  |          |        |
|------------------|----------|--------|
| O1W-H1WA...O6#21 | 2.758(4) | 178(2) |
| O1W-H1WB...O6#22 | 2.989(4) | 154(5) |
| N2-H2B...O4#23   | 2.811(3) | 151    |
| N4-H4A...O1W#24  | 2.842(4) | 168    |
| C21-H21A...O1#25 | 3.221(4) | 142    |

Symmetry transformations used to generate equivalent atoms: #1 -x, 1-y, 1-z; #2 -x,1-y,1-z; #3 1-x,1-y,1-z; #4 x,y,-1+z; #5 -x,2-y,-z; #6 x,3/2-y,-1/2+z; #7 1-x,2-y,1-z; #8 1-x,1/2+y,1/2-z; #9 1+x,y,1+z; #10 x,-1+y,z; #11 1-x,-y,1-z; #12 2-x,-y,1-z; #13 1/2+x,1/2-y,-1/2+z; #14 1-x,-y,1-z; #15 1-x,-y,-z; #16 1-x,-y,1-z; #17 -1+x,y,-1+z; #18 1-x,1-y,1-z; #19 -1+x,y,z; #20 2-x,1-y,2-z; #21 x,y,1+z; #22 1-x,-y,1-z; #23 -x,1-y,1-z; #24 1-x,1-y,2-z; #25 1-x,1-y,1-z.

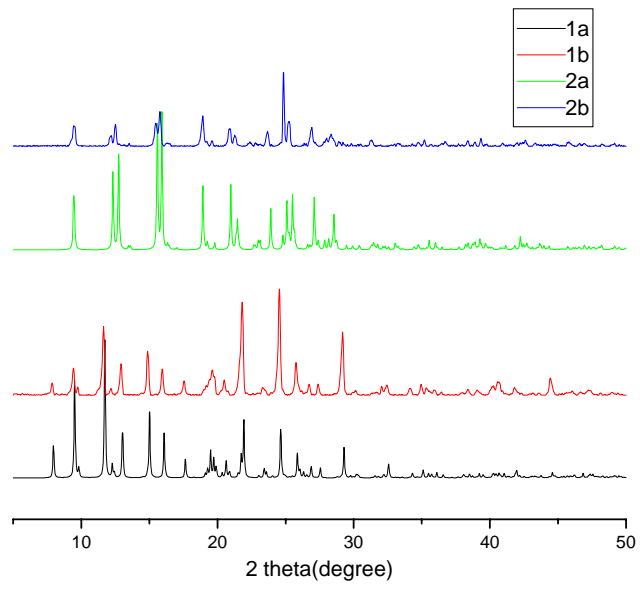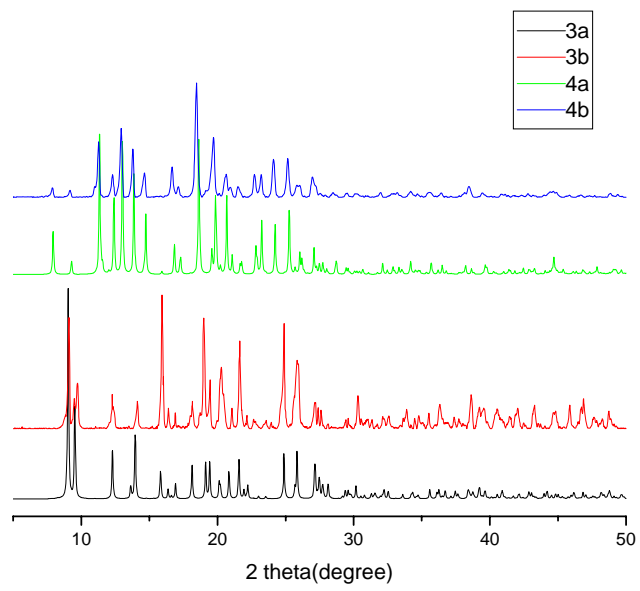

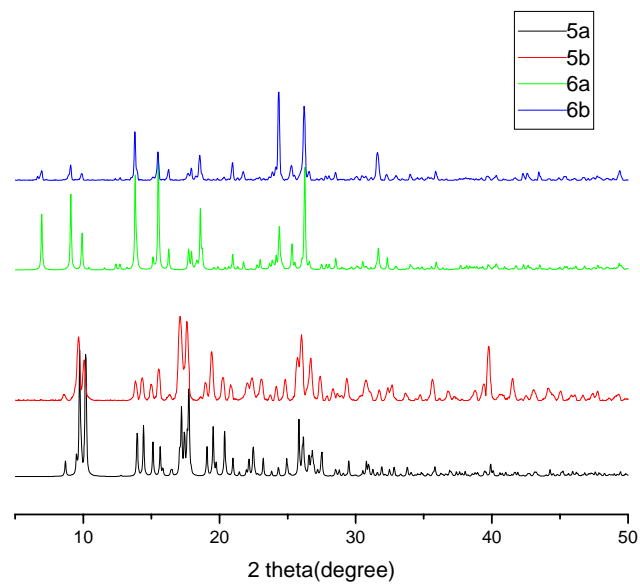

**Figure S1.** The X-ray powder diffraction patterns of **1 - 6**: a – simulated; b – as-synthesized.

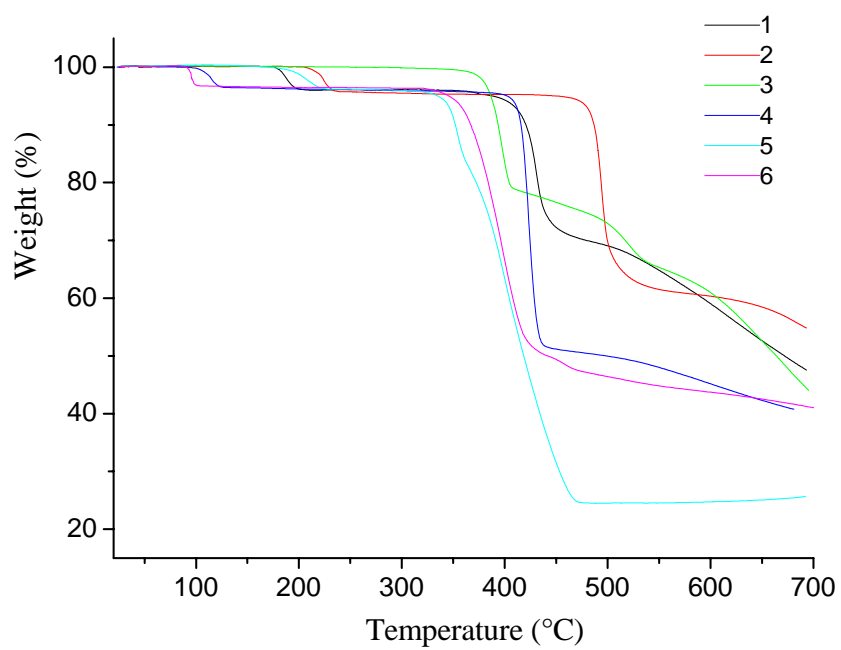

**Figure S2.** The TG curves of **1 - 6**.

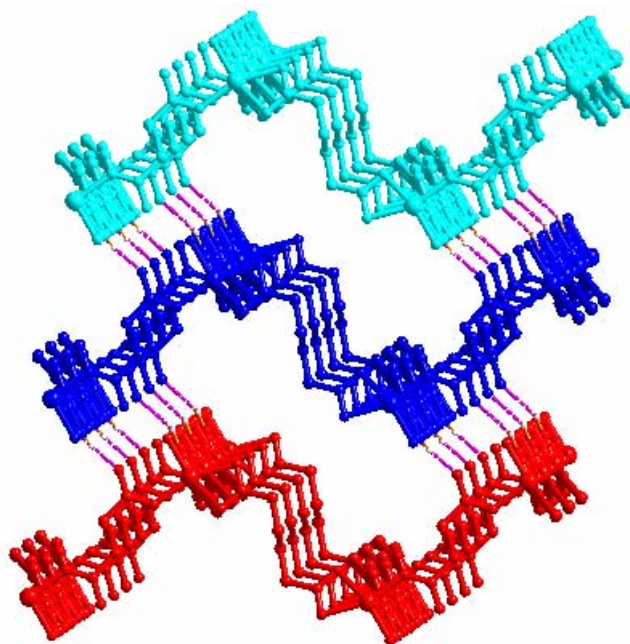

**Figure S3.** 3D framework of **1** linked by hydrogen bonds indicated by dashed line.

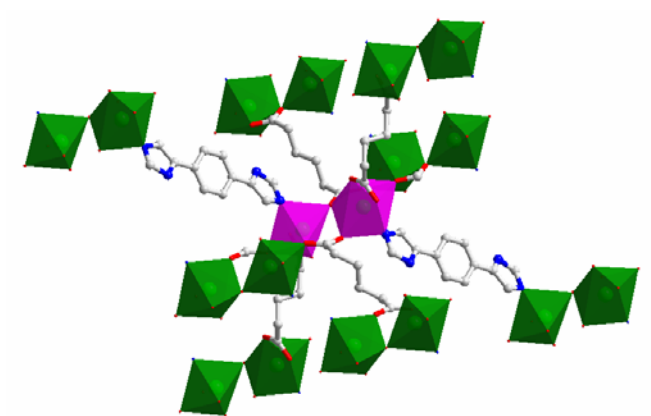

**Figure S4.** View of the linkages of a binuclear Cd(II) nodes (purple) with eight adjacent cores (green) of **3**.

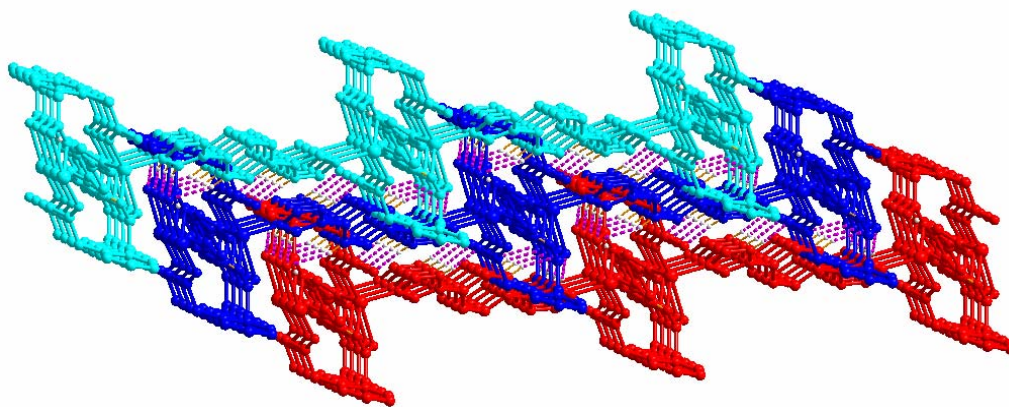

**Figure S5.** 3D framework of **5** linked by hydrogen bonds indicated by dashed line.



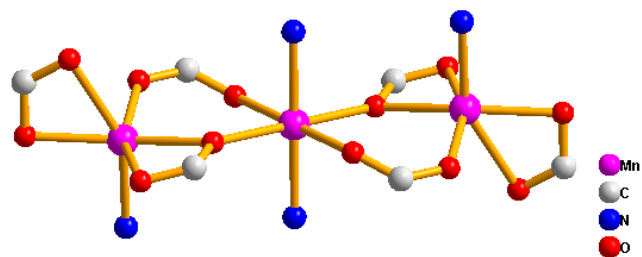

**Figure S6.** The Mn<sub>3</sub>-based SBUs [Mn<sub>3</sub>(CO<sub>2</sub>)<sub>6</sub>N<sub>4</sub>] of **6**.

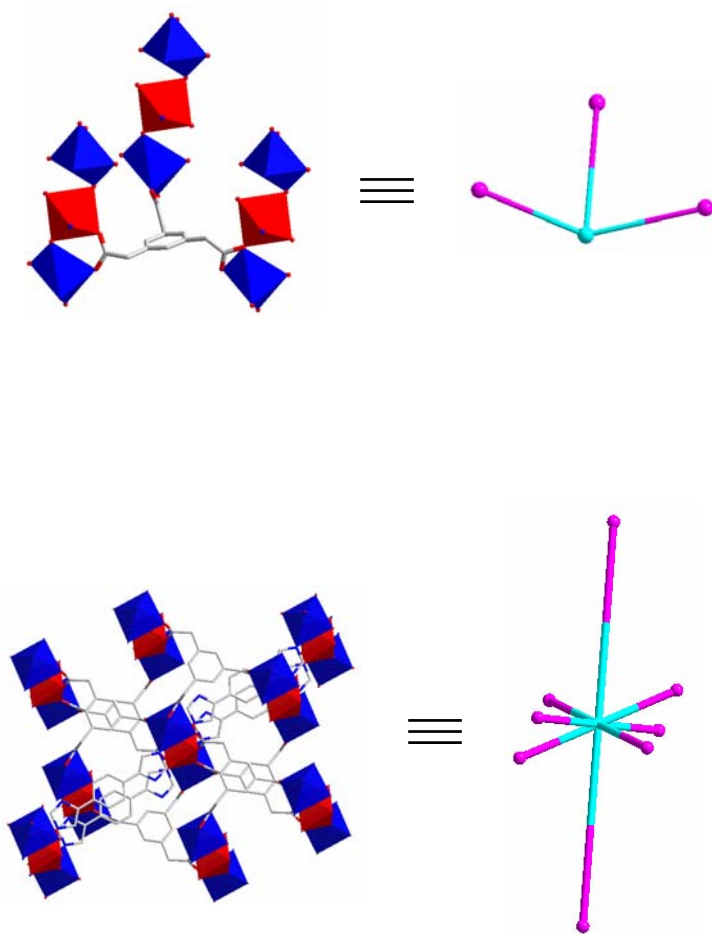

**Figure S7.** Ball-and-stick and polyhedral representations of the 3-connected bta<sup>3-</sup> ligand and 8-connected trinuclear Mn(II) cluster of **6**.
